# Supplementary material
Source: Springer Nature journal article supplement (https://www.springermedizin.de/resource/supplementary/12958_2013_1183_MOESM1_ESM.pdf/9566942)
Supplement: MOESM1 [file 9566942]

## Enrollment

Assessed for eligibility (n= 50)

Excluded (n=2)

Assigned (n=48)

## Allocation

### Recombinant gonadotropins

Allocated to intervention (n=23)

- ◆ Received allocated intervention (n=23)
- ◆ Did not receive allocated intervention (n=2)
  - ◆ Other reasons (n=2)

### Urinary gonadotropins

Allocated to intervention (n=25)

- ◆ Received allocated intervention (n=25)

## Follow-Up

Lost to follow-up (n=0)

Lost to follow-up (n=0)

## Analysis

Analysed (n=23)

Analysed (n=25)
